# Supplementary material
Source: HighWire-hosted journal article supplement (https://jnm.snmjournals.org/highwire/filestream/94459/field_highwire_adjunct_files/0/122077_Supplemental_Data.pdf)
Supplement: 122077_Supplemental_Data.pdf [file 122077_Supplemental_Data.pdf]

## Supplemental Data

### Corrections for Equilibrium Data

The initial awake studies were performed with tracer infusions with  $K_{bol}$  of 90 min, but this value was shown to not produce an optimal equilibrium. To correct these data, an SRTM-based correction algorithm was developed to determine correction factors in order to analyze all the awake data together. An anesthetized and an awake [ $^{11}\text{C}$ ]flumazenil bolus scan were used to define the rate constant parameters used for the simulation. The SRTM model was used to estimate kinetic parameters from time-activity curves (TACs) in regions-of-interest (ROIs) for both awake and anesthetized studies, where the pons TAC was fitted with a sum of exponentials function and was used as the reference input. The estimated parameters were  $R_1$  ( $R_1=K_1/K_1'$ ),  $k_2$ , and  $k_2'$ .  $K_1$  and  $K_1'$  ( $\text{mL}\cdot\text{cm}^{-3}\cdot\text{min}^{-1}$ ) are the rate constants of tracer influx and  $k_2$  ( $\text{min}^{-1}$ ) and  $k_2'$  ( $\text{min}^{-1}$ ) are the rate constants of tracer efflux in the ROI and reference tissue, respectively.

For the simulation, parameters  $R_1$  and  $k_2'$  were fixed based on the mean value for the ROIs analyzed from the anesthetized and awake studies. Based on the range of  $BP_{ND}$  values from the anesthetized (0.49-4.31) and awake (0.64-5.32) studies,  $k_2$  was varied to simulate bolus TACs from different ROIs with the SRTM model equation.  $BP_{ND}^{true}$  was computed as

$$BP_{ND}^{true} = R_1 \frac{k_2'}{k_2} - 1. \quad \text{Supplemental Eq. 1}$$

From the simulated bolus TACs,  $K_{bol}$  was chosen for the following cases to generate simulated B/I TACs: anesthetized with  $K_{bol}=90$  min, awake with  $K_{bol}=90$  min, and awake with  $K_{bol}=60$  min. Using the simulated B/I TACs, equilibrium analysis was used to compute apparent  $BP_{ND}$  values ( $BP_{ND}^{app}$ ) between 50-75 min as

$$BP_{ND}^{app} = \frac{C_{ROI}}{C_{REF}} - 1, \quad \text{Supplemental Eq. 2}$$

where  $C_{ROI}$  and  $C_{REF}$  are the concentrations (Bq/mL) in the ROI and the pons reference region.  $BP_{ND}^{app}$  was plotted against  $BP_{ND}^{true}$ , and points were fitted with a linear regression where the slope was the correction factor (CF) for each case. The corrected  $BP_{ND}$  was computed as  $BP_{ND}^{app} / CF$  from parametric image analysis for each ROI in each case of awake B/I studies with  $K_{bol} = 90$  min.

The correction factors (CF) for equilibrium analysis are shown for three cases in Supplemental Fig. 1 as determined by the slope of the regression between  $BP_{ND}^{true}$  and  $BP_{ND}^{app}$  values. For the anesthetized studies with  $K_{bol}=90$ min, the CF was 1.00, i.e., no correction for  $BP_{ND}$  was needed. For the awake studies with  $K_{bol}=90$  min, CF for  $BP_{ND}$  was 1.11. For awake studies with  $K_{bol}=60$  min, CF for  $BP_{ND}$  was 1.04. Thus, lowering  $K_{bol}$  for awake studies from 90 min to 60 min reduced the bias in  $BP_{ND}$  values from 11% to 4%.

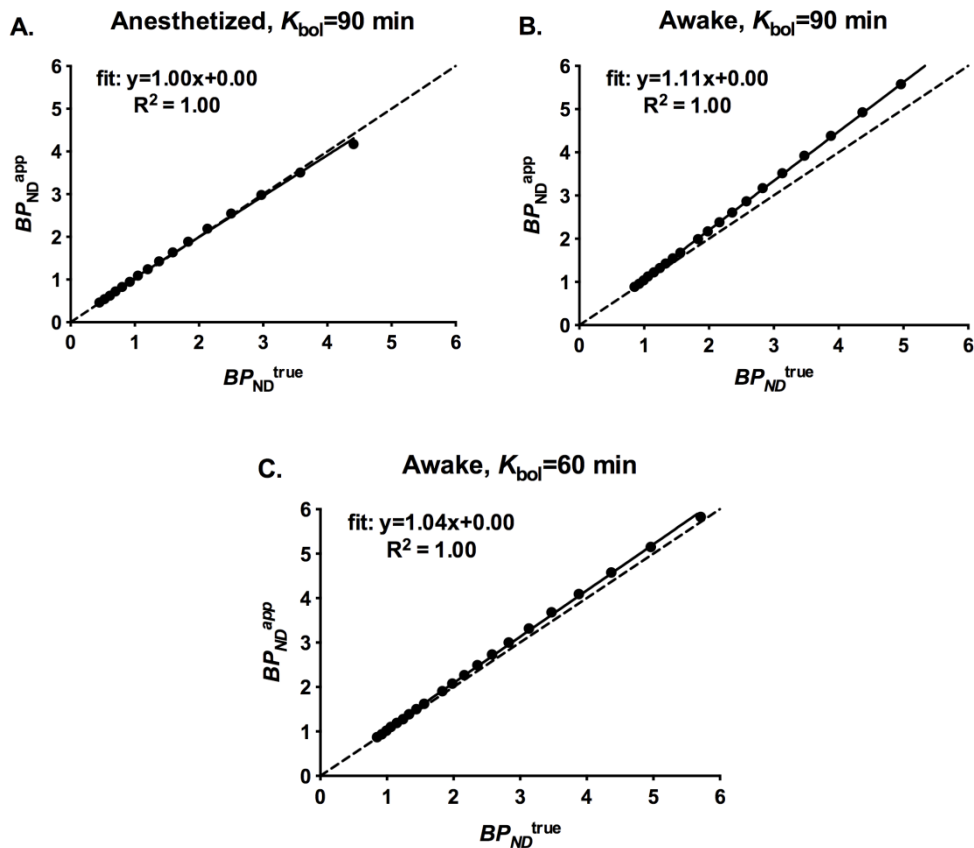

**Supplemental Figure 1.** Correction factors for equilibrium analysis.  $BP_{ND}^{true}$  values were computed from bolus time-activity curves (TACs) simulated with SRTM.  $BP_{ND}^{app}$  was computed between 50-75 min with Supplemental Eq. 2 from simulated B/I curves for three cases: A) anesthetized studies with  $K_{bol}=90$  min, B) awake studies with  $K_{bol}=90$  min, and C) awake studies with  $K_{bol}=60$  min. The slope of the regression line (solid) provided the correction factor for each case. The identity line (dashed) is shown for reference.
